# Supplementary material for: Novel signaling pathways regulate SARS-CoV and SARS-CoV-2 infectious disease
Source: PubMed Central journal article supplement — Medicine (Baltimore). 2021 Feb 19;100(7):e24321. doi: 10.1097/MD.0000000000024321 (PMC7899890; doi:10.1097/md.0000000000024321), 2021-02-19

(A) Hallmark: p53 pathway

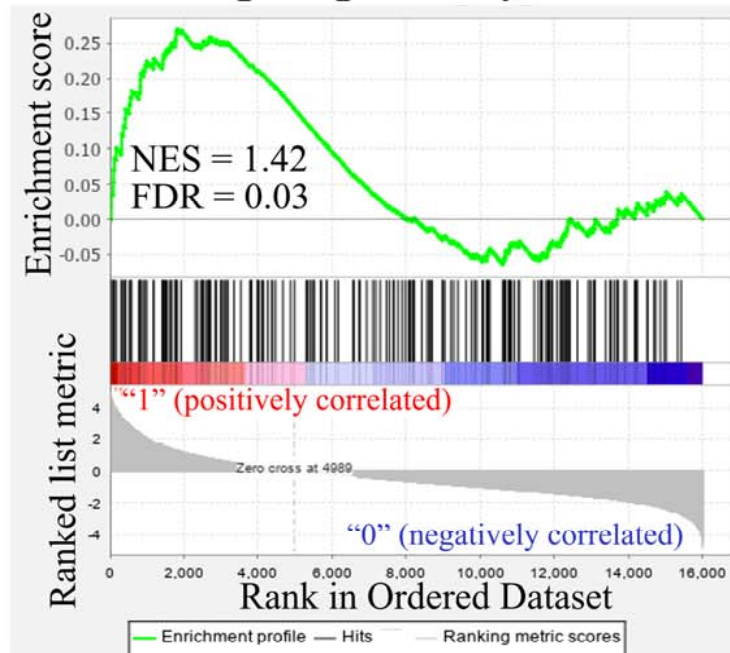

(B) Hallmark: Hypoxia

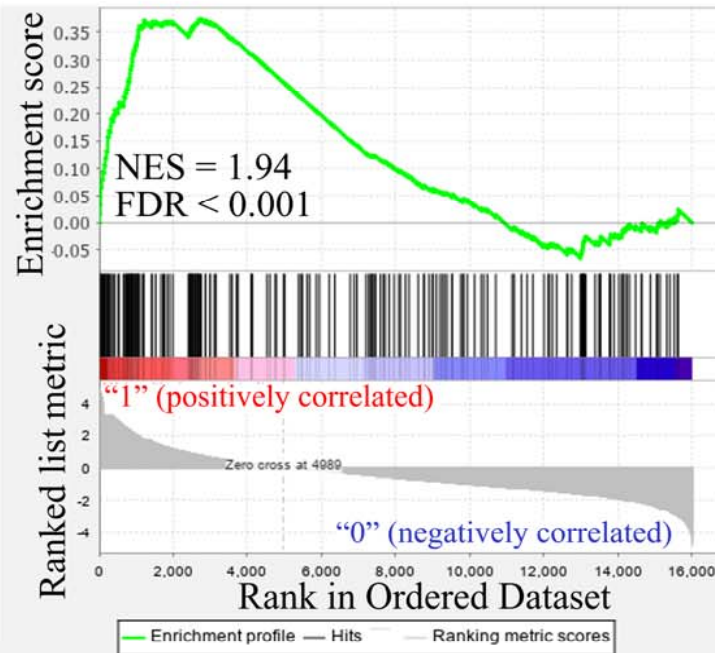

(C) GO: Receptor signaling pathway via STAT

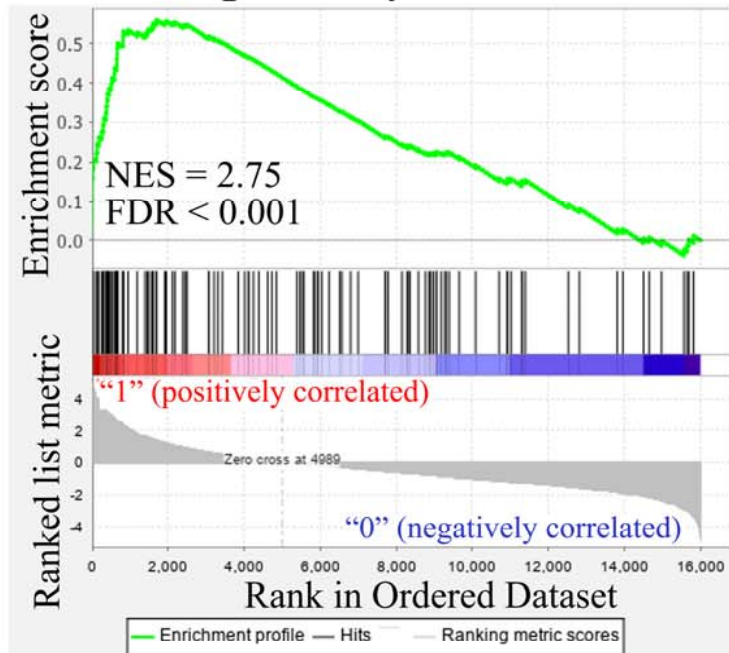

(D) KEGG: Hematopoietic cell lineage

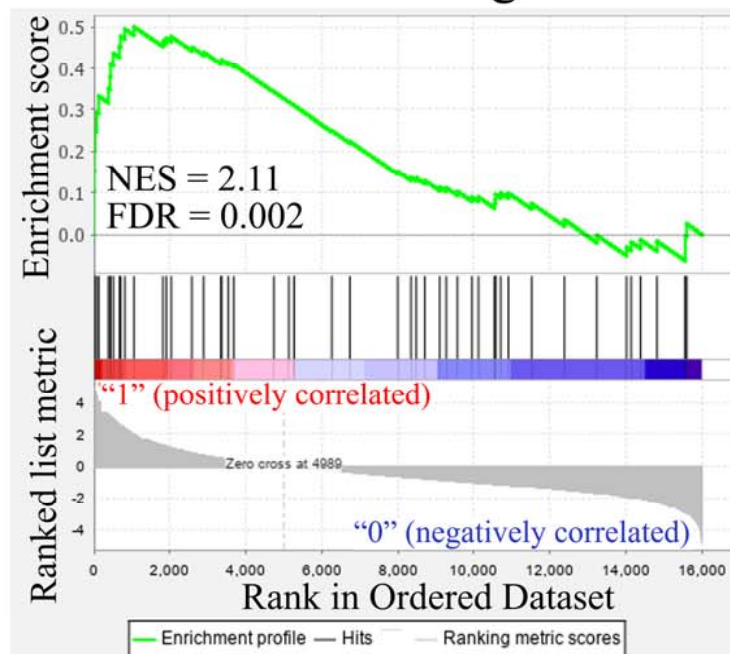

(E) Hallmark: Complement

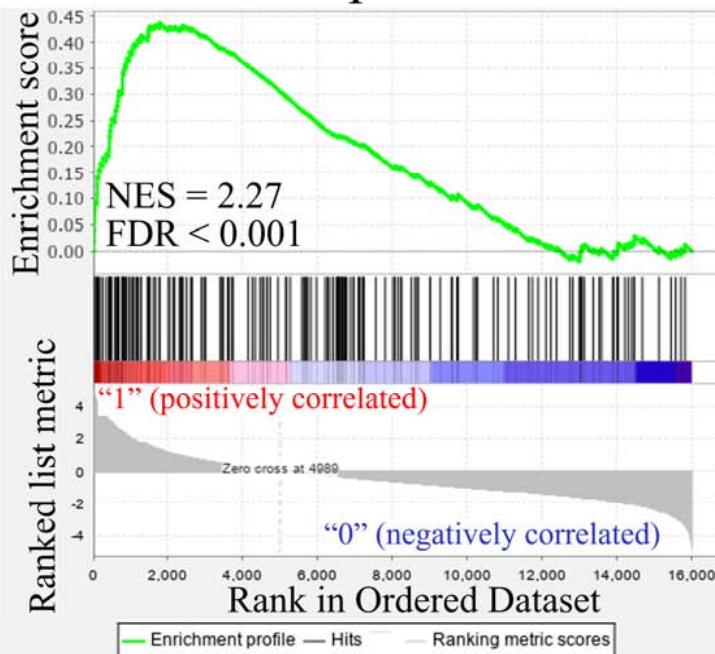

(F) KEGG: Type I diabetes mellitus

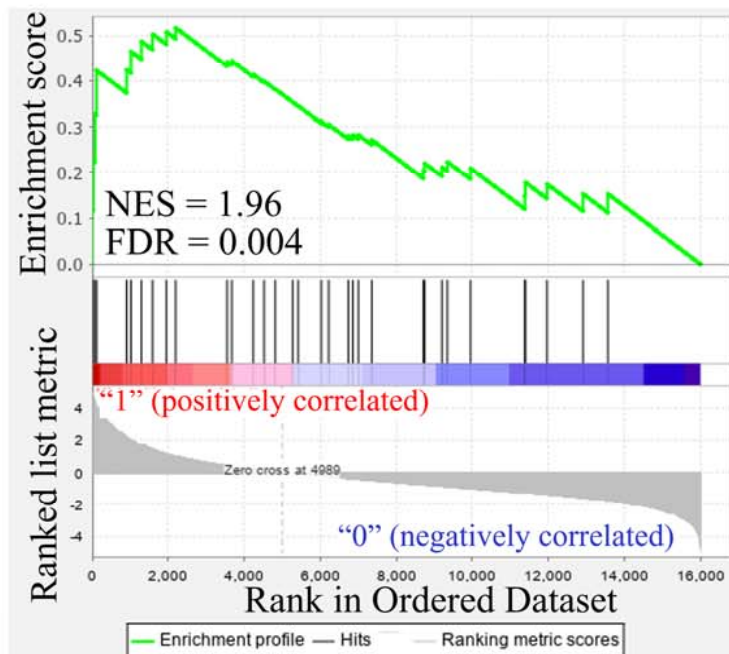

Supplement: medi-100-e24321-s002.pdf [file medi-100-e24321-s002.pdf]
