# Supplementary material for: Novel signaling pathways regulate SARS-CoV and SARS-CoV-2 infectious disease
Source: PubMed Central journal article supplement — Medicine (Baltimore). 2021 Feb 19;100(7):e24321. doi: 10.1097/MD.0000000000024321 (PMC7899890; doi:10.1097/md.0000000000024321), 2021-02-19

CYTOKINE RECEPTOR INTERACTION

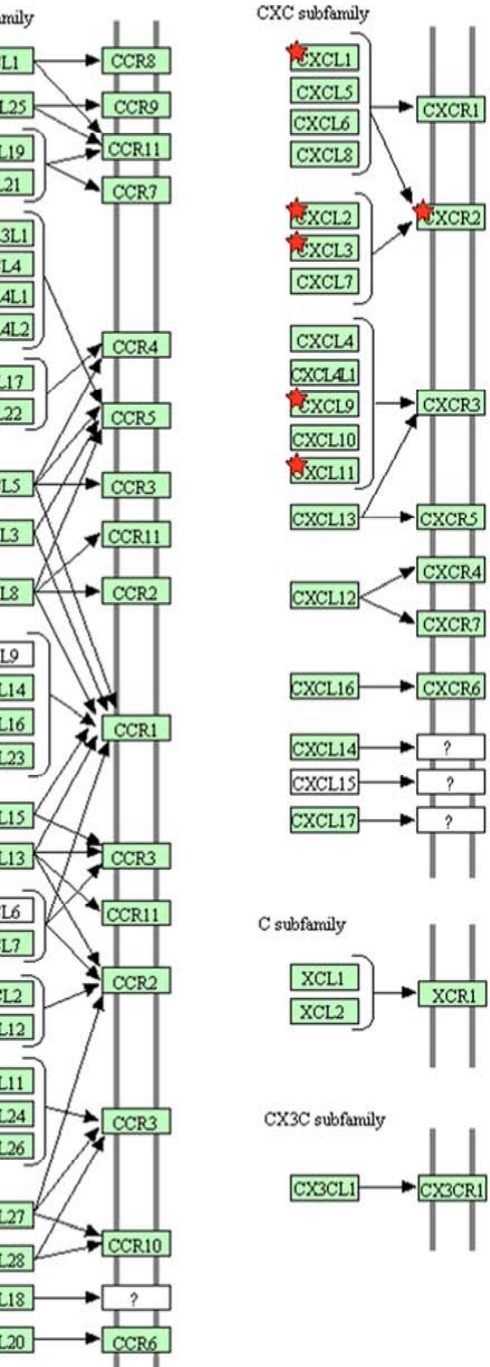

The class I helical cytokines  
γ-chain utilising

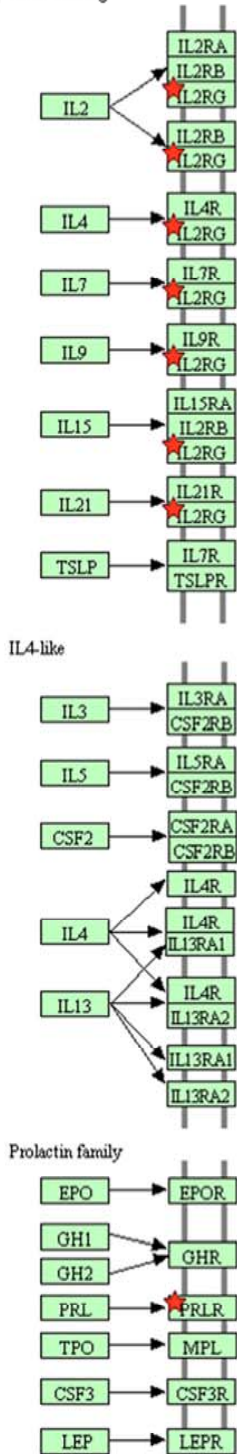

The class II helical cytokines

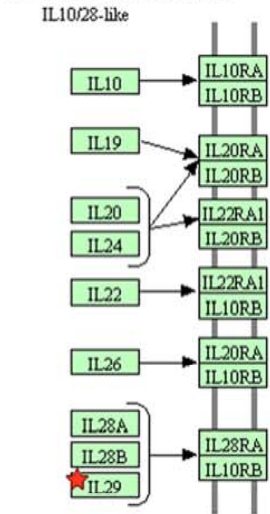

IL6/12-like

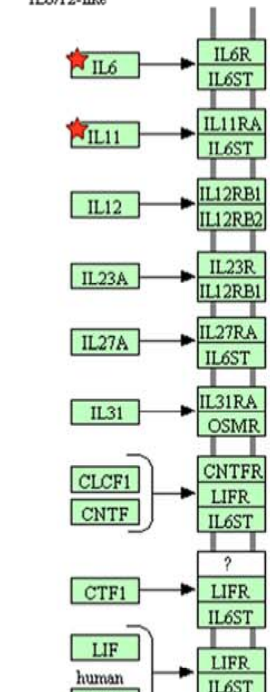

Interferon family

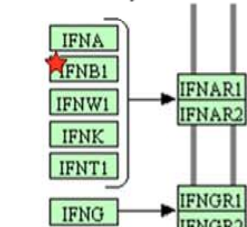

IL1-like cytokines

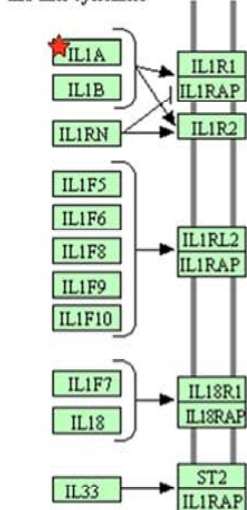

IL17-like cytokines

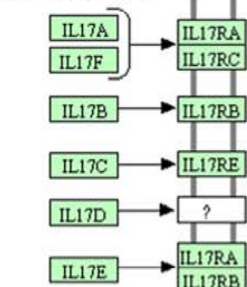

Non-classified

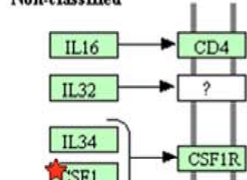

TNF Family

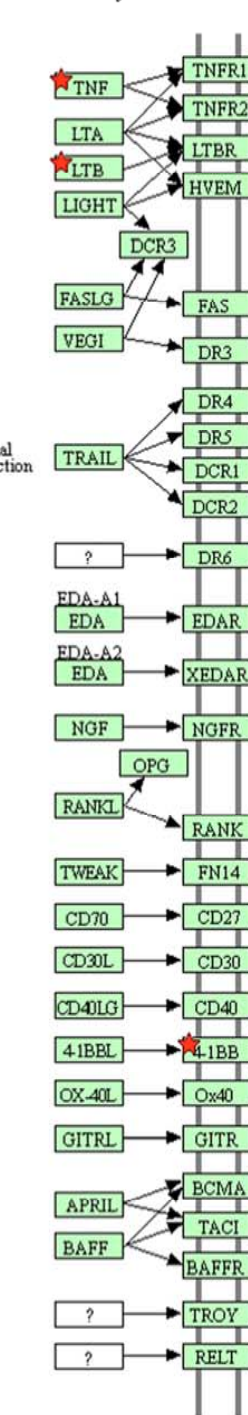

TGF-β family

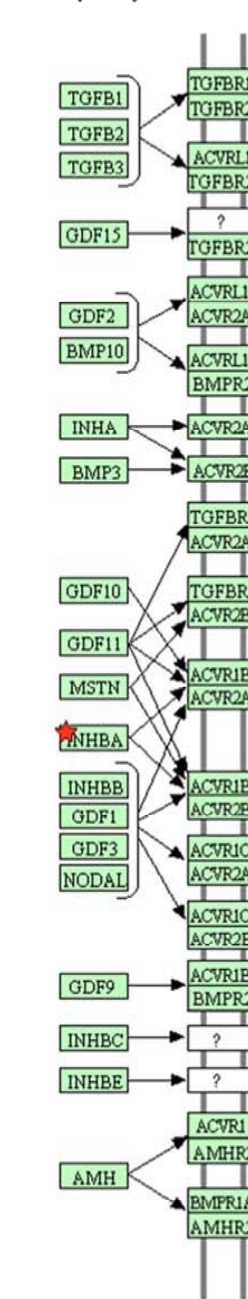

Supplement: medi-100-e24321-s004.pdf [file medi-100-e24321-s004.pdf]
