# Supplementary figures and images for: Novel signaling pathways regulate SARS-CoV and SARS-CoV-2 infectious disease
Source: PubMed Central journal article supplement — Medicine (Baltimore). 2021 Feb 19;100(7):e24321. doi: 10.1097/MD.0000000000024321 (PMC7899890; doi:10.1097/md.0000000000024321), 2021-02-19

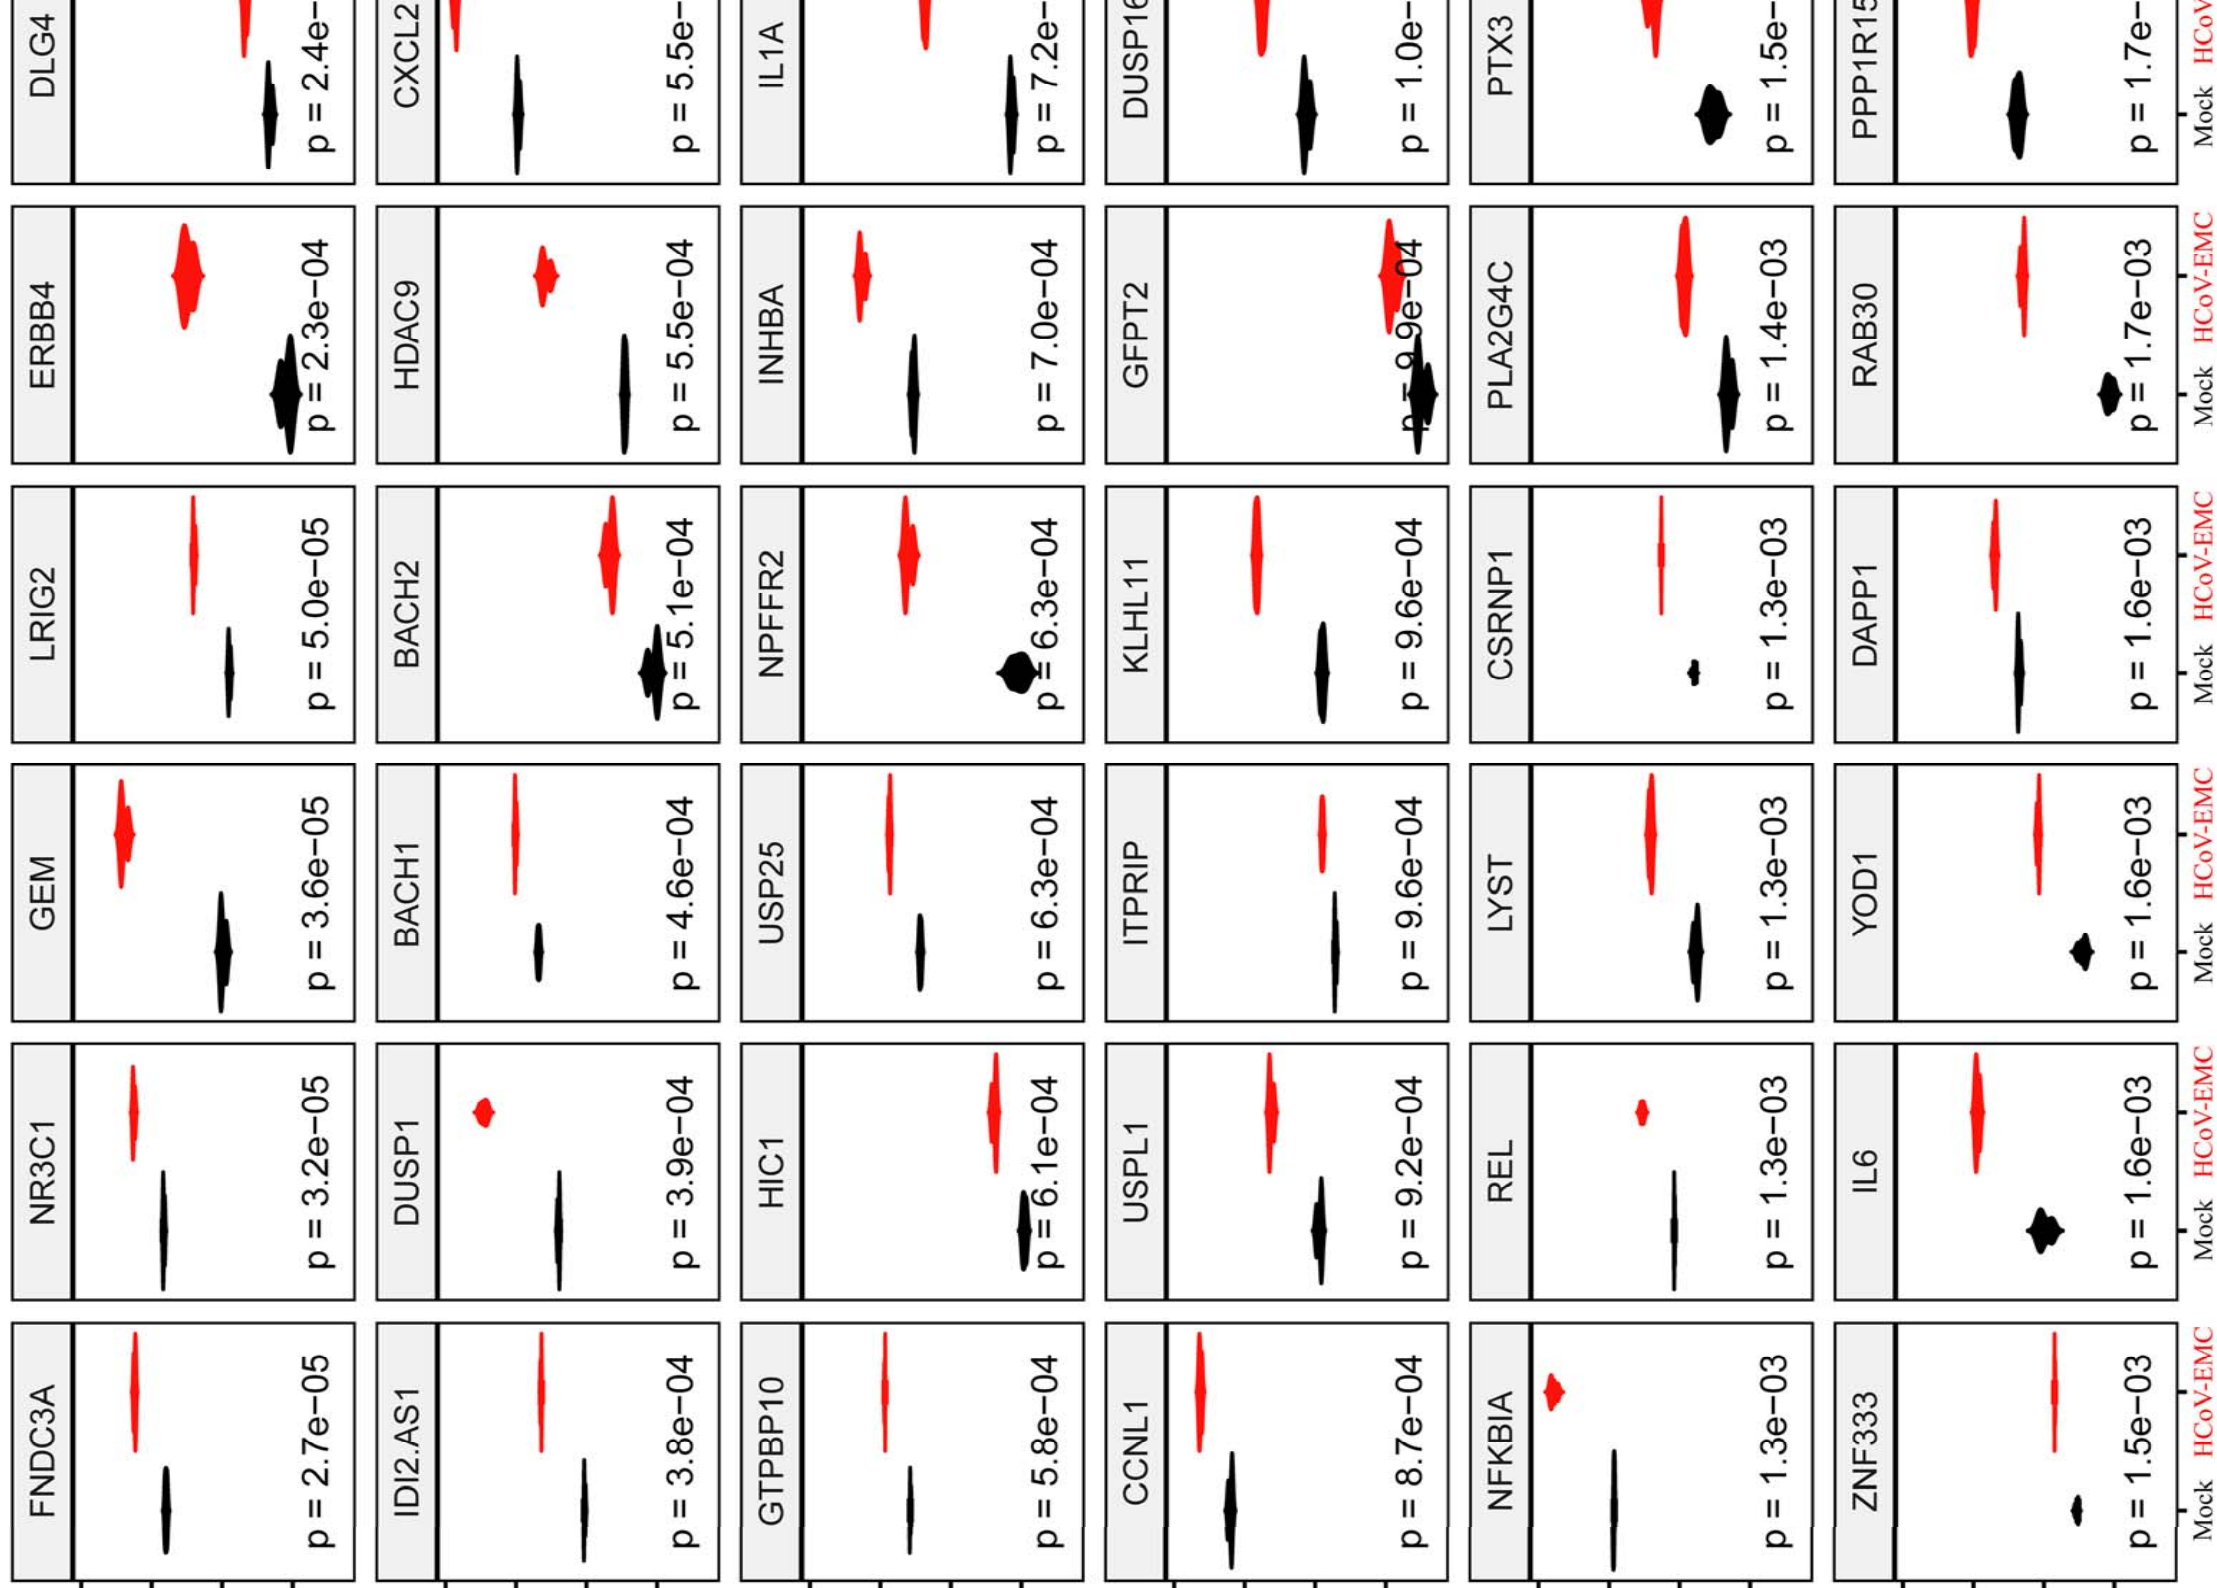

Supplement: medi-100-e24321-s003.pdf [file medi-100-e24321-s003.pdf]

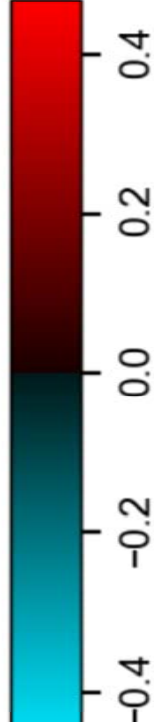

Differential Expression (log2)

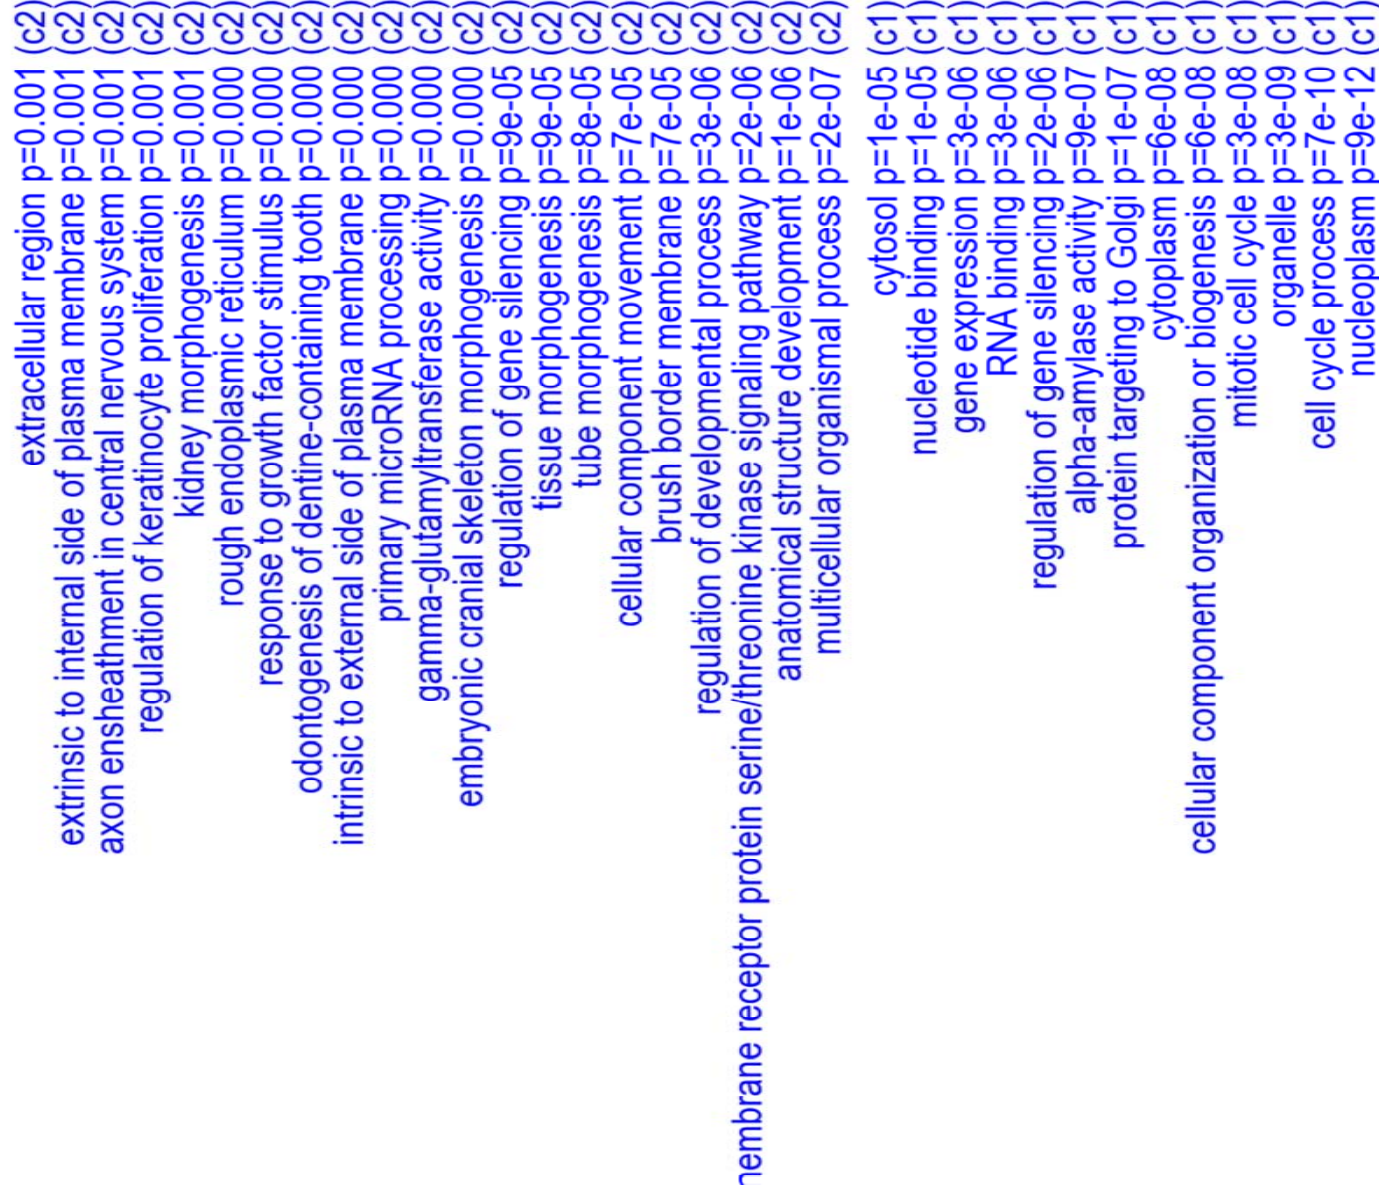

S1:SARS-CoV

C1:control

C2:control-2

C3:control-3

Supplement: medi-100-e24321-s005.pdf [file medi-100-e24321-s005.pdf]
